# Supplementary material
Source: Royal Society of Chemistry journal article supplement (doi:10.1039/d6nj00521g)
Supplement: d6nj00521g1.pdf [file d6nj00521g1.pdf]

## Supporting Information

### **An *o*-Carborane-Based Naphthalene Macrocyclic Arene: Dual-State Emission and C<sub>60</sub> Recognition**

Wenlong Chen,<sup>a</sup> Shuai Yuan,<sup>a</sup> Caixia Lin,<sup>\*a</sup> and Yaofeng Yuan<sup>\*a</sup>

*a* Key Laboratory of Molecule Synthesis and Function Discovery (Fujian Province University), College of Chemistry, Fuzhou University, Fuzhou, Fujian, 350108, China.

Email: lincaixia\_fzu@fzu.edu.cn; yaofeng.yuan@fzu.edu.cn.

|                                                          |          |
|----------------------------------------------------------|----------|
| <b>1. NMR and HR-MS (ESI) Spectra of Compounds .....</b> | <b>2</b> |
| <b>2. Crystal Data and Structure Refinement.....</b>     | <b>7</b> |
| <b>3. Fluorescence Properties.....</b>                   | <b>8</b> |
| <b>4. Density Functional Theory .....</b>                | <b>9</b> |

---

## 1. NMR and HR-MS (ESI) Spectra of Compounds

**Figure S1.**  $^1\text{H}$  NMR spectrum of **3** (500 MHz,  $\text{CDCl}_3$ ).

**Figure S2.**  $^{13}\text{C}$  NMR spectrum of **3** (126 MHz,  $\text{CDCl}_3$ ).

---

**Figure S3.**  $^1\text{H}$  NMR spectrum of **4** (500 MHz,  $\text{CDCl}_3$ ).

**Figure S4.**  $^{13}\text{C}$  NMR spectrum of **4** (126 MHz,  $\text{CDCl}_3$ )

---

**Figure S5.**  $^{11}\text{B}\{^1\text{H}\}$  NMR spectrum of **4** (160 MHz,  $\text{CDCl}_3$ )

**Figure S6.**  $^1\text{H}$  NMR spectrum of **5** (500 MHz,  $\text{CDCl}_3$ ).

---

**Figure S7.**  $^{13}\text{C}$  NMR spectrum of **5** (126 MHz,  $\text{CDCl}_3$ )

**Figure S8.**  $^{11}\text{B}\{^1\text{H}\}$  NMR spectrum of **5** (160 MHz,  $\text{CDCl}_3$ )

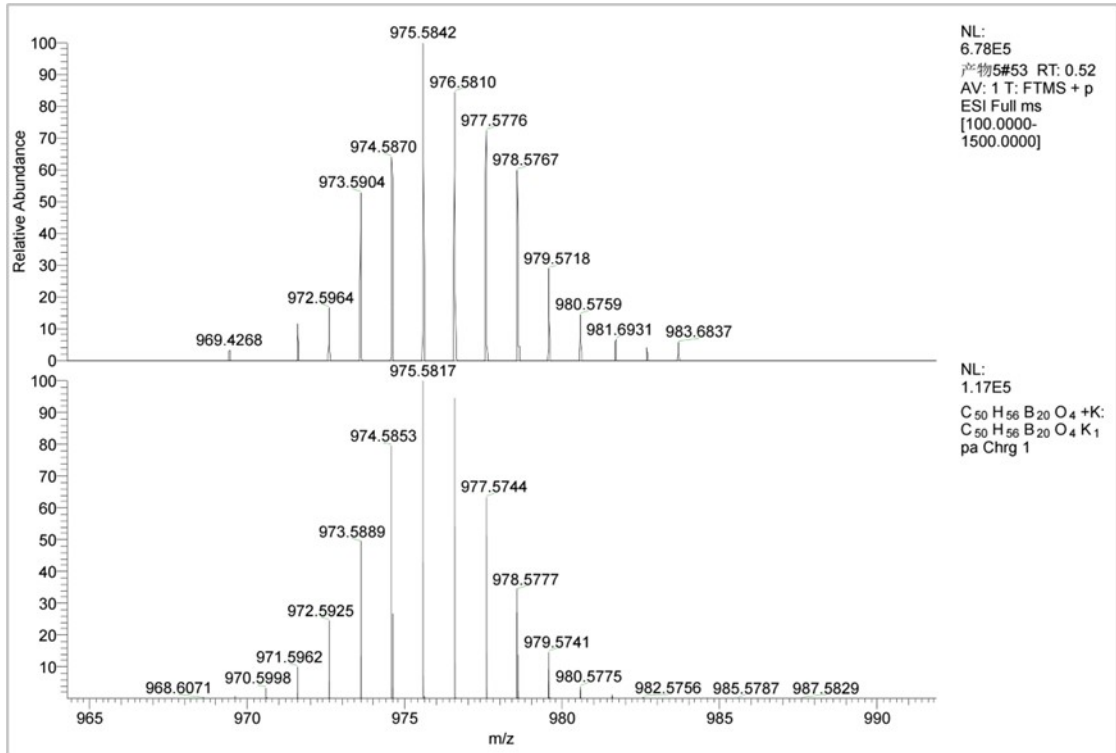

Figure S9. HR-MS (ESI) spectrum of 5.

---

## 2. Crystal Data and Structure Refinement

**Table S1.** Crystal data and structure refinement for **5**.

| Compound                           | <b>5</b>                                                       |
|------------------------------------|----------------------------------------------------------------|
| Empirical formula                  | C <sub>50</sub> H <sub>56</sub> B <sub>20</sub> O <sub>4</sub> |
| Formula weight                     | 937.15                                                         |
| Temperature/K                      | 293K(2)                                                        |
| Crystal system                     | monoclinic                                                     |
| Space group                        | P -1                                                           |
| a/Å                                | 11.3775(6)                                                     |
| b/Å                                | 11.5862(7)                                                     |
| c/Å                                | 25.9327(6)                                                     |
| α/°                                | 91.335(3)                                                      |
| β/°                                | 99.372(3)                                                      |
| γ/°                                | 118.660(6)                                                     |
| Volume/Å <sup>3</sup>              | 2939.3(3)                                                      |
| Z                                  | 2                                                              |
| ρ <sub>calc</sub> /cm <sup>3</sup> | 1.059                                                          |
| μ/mm <sup>-1</sup>                 | 0.448                                                          |
| F(000)                             | 976.0                                                          |
| Crystal size/mm <sup>3</sup>       | 0.11 × 0.11 × 0.25                                             |
| Radiation                          | CuKα (λ = 1.54184)                                             |
| Final R indexes [I>=2σ (I)]        | R <sub>1</sub> = 0.0732,<br>wR <sub>2</sub> = 0.2255           |
| Final R indexes [all data]         | R <sub>1</sub> = 0.1054,<br>wR <sub>2</sub> = 0.3545           |
| CCDC                               | 2529589                                                        |

### 3. Fluorescence Properties

**Table S 2.** Photophysical Data of Compound **5** in Different Solvents.

| Solvents          | $\epsilon$ | $n$    | $f(\epsilon, n)$ | $\lambda_a(\text{nm})$ | $\lambda_f(\text{nm})$ | $\Delta\lambda(\text{nm})$ | $\nu_a-\nu_f(\text{cm}^{-1})$ |
|-------------------|------------|--------|------------------|------------------------|------------------------|----------------------------|-------------------------------|
| MePh              | 2.38       | 1.496  | 0.014            | 314                    | 569                    | 255                        | 14272                         |
| DCM               | 8.93       | 1.424  | 0.217            | 315                    | 615                    | 300                        | 15486                         |
| CHCl <sub>3</sub> | 4.81       | 1.447  | 0.148            | 314                    | 598                    | 284                        | 15125                         |
| THF               | 7.58       | 1.407  | 0.209            | 315                    | 625                    | 310                        | 15746                         |
| DMSO              | 48.9       | 1.479  | 0.280            | 315                    | 646                    | 331                        | 16266                         |
| MeCN              | 37.5       | 1.344  | 0.305            | 315                    | 660                    | 345                        | 16595                         |
| MeOH              | 33.6       | 1.329  | 0.309            | 315                    | 650                    | 335                        | 16361                         |
| DMF               | 36.7       | 1.4305 | 0.274            | 315                    | 685                    | 370                        | 17147                         |

$\epsilon$ : Static dielectric constant of the solvent.  $n$ : Refractive index of the solvent at the measurement temperature.  $f(\epsilon, n)$ : Orientation polarizability (Lippert-Mataga solvent polarity parameter), calculated

$$\text{using the formula } \Delta f = \frac{\epsilon - 1}{2\epsilon + 1} - \frac{n^2 - 1}{2n^2 + 1}$$

$\lambda_a$ : Maximum absorption wavelength.  $\lambda_f$ : Maximum fluorescence emission wavelength.  $\Delta\lambda$ : Stokes shift.

$\nu_a-\nu_f$ : Stokes shift, expressed in wavenumbers ( $\text{cm}^{-1}$ ), calculated as  $\nu_a-\nu_f = \left(\frac{1}{\lambda_a} - \frac{1}{\lambda_f}\right) \times 10^7$ .

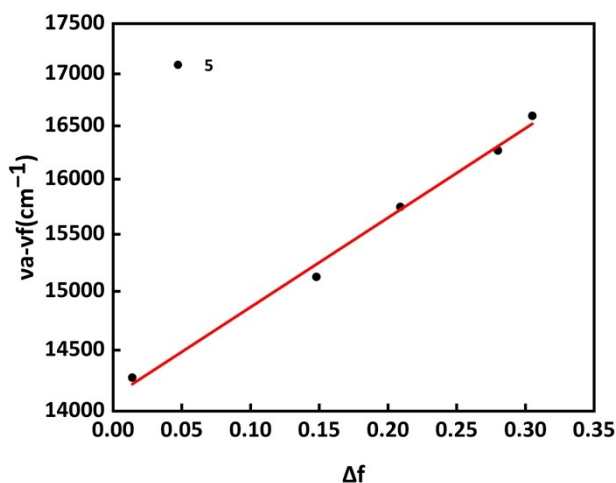

**Figure. S10** Solvatochromic Lippert - Mataga models of **5**.

Figure S11. DLS data of **5** in H<sub>2</sub>O.

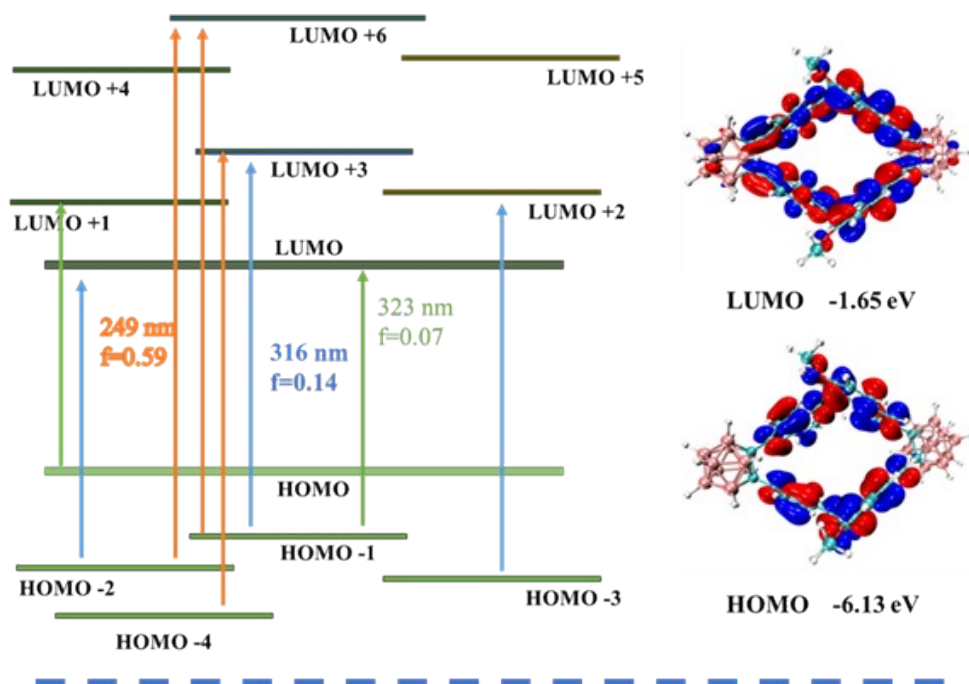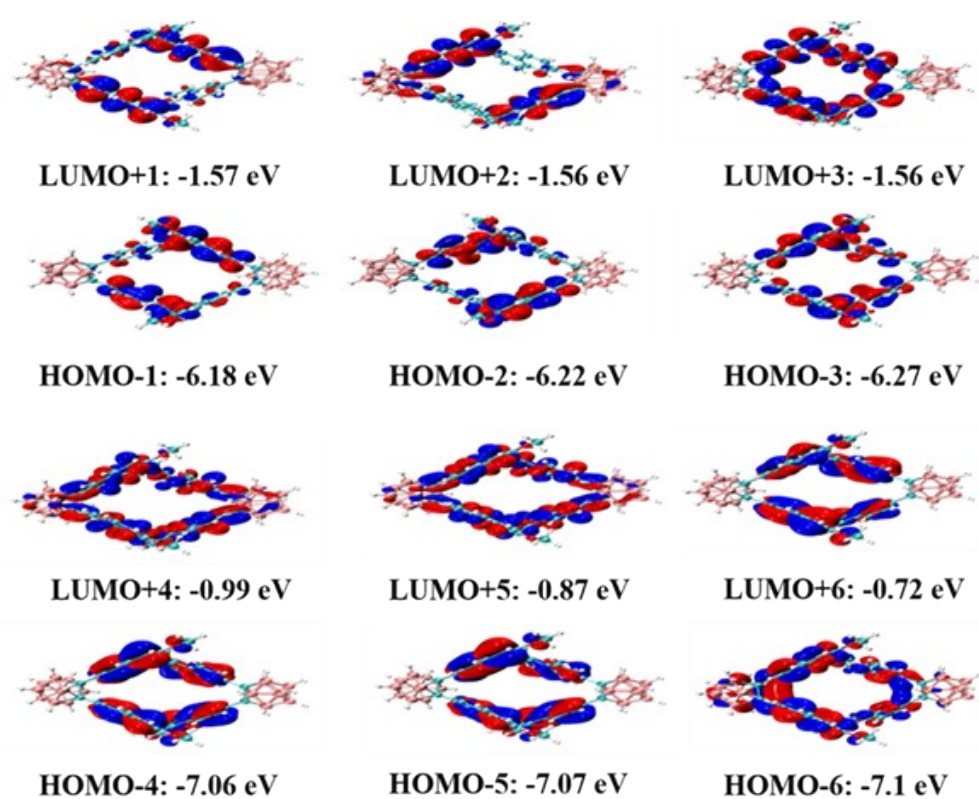

Figure S12. TD-DFT Calculations for Compound **5** at the PBE1PBE Level

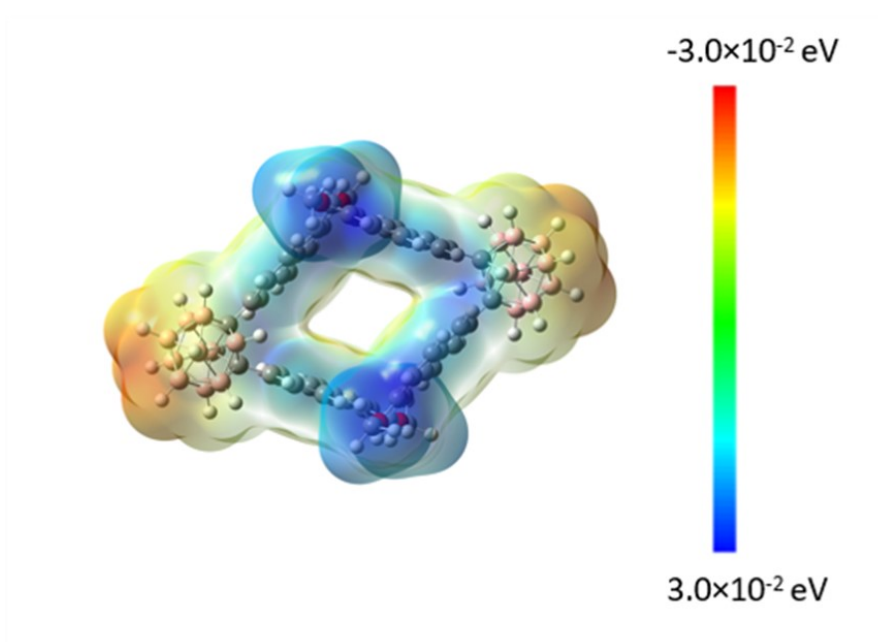

**Figure S13.** Electrostatic Potential Surface Analysis of **5**

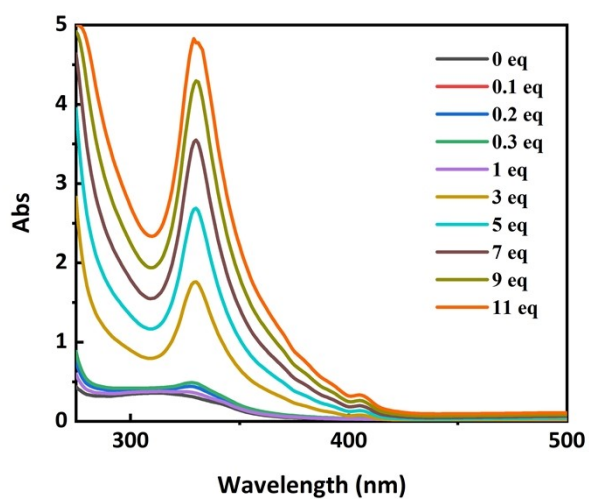

**Figure S14.** UV-vis titration of **5** ( $1.0 \times 10^{-5}$  M) in toluene at 298 K with the C<sub>60</sub> (0-15 eq).

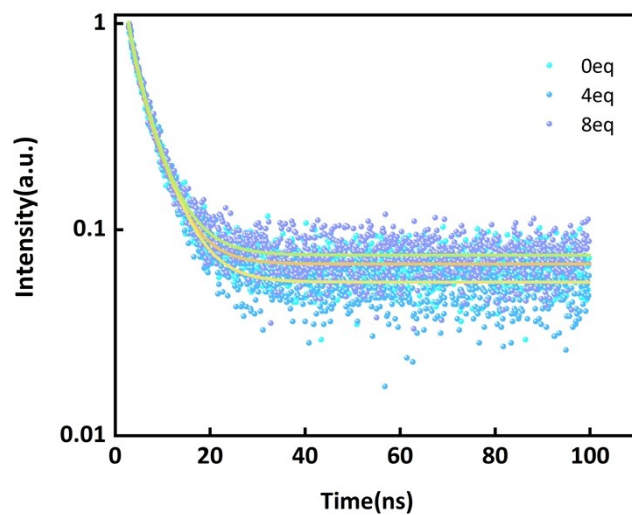

**Figure S15.** Fluorescence lifetime curves of **5** ( $1.0 \times 10^{-5}$  M) in toluene at 298 K with different equivalents of C<sub>60</sub> (0-8 eq) excited at 340 nm.
